# Supplementary material for: Exercise versus Metformin to Improve Pregnancy Outcomes among Overweight Pregnant Women: A Systematic Review and Network Meta-Analysis
Source: MDPI journal article supplement (doi:10.3390/jcm10163490), 2021-08-07

**Table S1.** Direct estimates obtained.

| Reference                     | Intervention | GDM  |               | HDP  |               | MWG             |                |
|-------------------------------|--------------|------|---------------|------|---------------|-----------------|----------------|
|                               |              | RR   | 95% CI        | RR   | 95% CI        | $\Delta\bar{x}$ | 95% CI         |
| Kong K et al (2014)-1         | Aerobic      | 1.00 | (0.07, 13.64) | 1.00 | (0.02, 45.63) | 0.59            | (-4.74, 5.92)  |
| Kong K et al (2014)-2         | Aerobic      | 1.10 | (0.02, 50.43) | 3.30 | (0.15, 72.08) | - 0.41          | (-8.31, 7.49)  |
| Seneviratne SN et al (2016)   | Aerobic      | 2.00 | (0.39, 10.26) | 2.00 | (0.19, 21.11) | - 1.20          | (-3.73, 1.33)  |
| Wang C et al (2017)           | Aerobic      | 0.54 | (0.37, 0.79)  | 0.88 | (0.50, 1.53)  | - 2.09          | (-2.99, -1.19) |
| Barakat R et al (2016)-1      | Combined     | 0.43 | (0.08, 2.30)  | 0.58 | (0.17, 1.97)  | -               | -              |
| Barakat R et al (2016)-2      | Combined     | 1.16 | (0.08, 17.60) | 2.32 | (0.22, 24.09) | -               | -              |
| Bisson M et al (2015)         | Combined     | 0.60 | (0.16, 2.23)  | 0.67 | (0.12, 3.64)  | 0.10            | (-2.74, 2.94)  |
| Daly N et al (2017)           | Combined     | 1.19 | (0.80, 1.77)  | -    | -             | - 1.70          | (-4.19, 0.79)  |
| Garnæs KK et al (2016)        | Combined     | 0.59 | (0.21, 1.64)  | 0.41 | (0.11, 1.45)  | 1.30            | (-1.50, 4.10)  |
| Nascimento SL et al (2011)    | Combined     | -    | -             | -    | -             | - 1.20          | (-3.96, 1.56)  |
| Oostdam N et al (2012)        | Combined     | 0.68 | (0.28, 1.60)  | -    | -             | 0.60            | (-1.24, 2.44)  |
| Ruiz JR et al (2013)          | Combined     | 0.66 | (0.29, 1.52)  | 0.71 | (0.29, 1.74)  | - 0.50          | (-1.52, 0.52)  |
| Barakat R et al (2009) – 1    | Resistance   | -    | -             | -    | -             | - 1.40          | (-4.67, 1.87)  |
| Barakat R et al (2009) – 2    | Resistance   | -    | -             | -    | -             | - 1.30          | (-4.34, 1.74)  |
| Abd El Fattah EA et al (2016) | Metformin    | 0.33 | (0.07, 1.61)  | 0.33 | (0.07, 1.61)  | - 5.06          | (-5.82, -4.30) |
| Brink HS et al (2018)         | Metformin    | 0.65 | (0.37, 1.14)  | 0.21 | (0.01, 4.12)  | -               | -              |
| Chiswick C et al (2015)       | Metformin    | 0.78 | (0.50, 1.22)  | 1.65 | (0.93, 2.93)  | - 0.53          | (-1.78, 0.72)  |
| Nascimento IB et al (2020)    | Metformin    | 0.67 | (0.31, 1.45)  | 0.18 | (0.08, 0.42)  | -               | -              |
| Syngelaki A et al (2016)      | Metformin    | 1.10 | (0.64, 1.88)  | 0.52 | (0.31, 0.88)  | -               | -              |

**Table S2.** Excluded trials with reasons.

| Reference                              | Intervention         | Main reason for exclusion   |
|----------------------------------------|----------------------|-----------------------------|
| Brislane Á et al (2021) [79]           | Aerobic exercise     | Total or normalweight women |
| Calvalcante SR et al (2009) [80]       | Aerobic exercise     | Total or normalweight women |
| Clapp JF et al (2000) [81]             | Aerobic exercise     | Total or normalweight women |
| de Oliveria Melo AS et al (2012) [82]  | Aerobic exercise     | Total or normalweight women |
| Ghodsi Z et al (2014) [83]             | Aerobic exercise     | Total or normalweight women |
| Guelfi KJ et al (2016) [84]            | Aerobic exercise     | Total or normalweight women |
| Hopkins SA et al (2011) [85]           | Aerobic exercise     | Total or normalweight women |
| Kasawara KT et al (2013) [86]          | Aerobic exercise     | Other risk factors          |
| Khoram S et al (2019) [87]             | Aerobic exercise     | Other risk factors          |
| Kihlstrand M et al (1999) [88]         | Aerobic exercise     | Total or normalweight women |
| Ko CW et al (2014) [89]                | Aerobic exercise     | Total or normalweight women |
| Labonte-Lemoyne E et al (2017) [90]    | Aerobic exercise     | Total or normalweight women |
| Marquez-Sterling S et al (2000) [91]   | Aerobic exercise     | Total or normalweight women |
| McDonald SM et al (2020) [92]          | Aerobic exercise     | Total or normalweight women |
| Navas A et al (2021) [93]              | Aerobic exercise     | Total or normalweight women |
| Sedaghati P et al (2007) [94]          | Aerobic exercise     | Total or normalweight women |
| Taniguchi C et al (2016) [95]          | Aerobic exercise     | Total or normalweight women |
| Tomic V et al (2013) [96]              | Aerobic exercise     | Total or normalweight women |
| Wen-Chun S et al (2021) [97]           | Aerobic exercise     | Total or normalweight women |
| Rakhshani A et al (2012) [98]          | Alternative exercise | Total or normalweight women |
| Sonmezer E et al (2021) [99]           | Alternative exercise | Total or normalweight women |
| Sun YC et al (2010) [100]              | Alternative exercise | Total or normalweight women |
| Bacchi M et al (2018) [101]            | Combined exercise    | Total or normalweight women |
| Backhausen MG et al (2017) [102]       | Combined exercise    | Total or normalweight women |
| Barakat R et al (2011) [103]           | Combined exercise    | Total or normalweight women |
| Barakat R et al (2012) [104]           | Combined exercise    | Total or normalweight women |
| Barakat R et al (2013) [105]           | Combined exercise    | Total or normalweight women |
| Barakat R et al (2018) [106]           | Combined exercise    | Total or normalweight women |
| Barakat R et al (2019) [107]           | Combined exercise    | Total or normalweight women |
| Brik M et al (2018) [108]              | Combined exercise    | Total or normalweight women |
| Broberg L et al (2021) [109]           | Combined exercise    | Total or normalweight women |
| Cordero Y et al (2012) [110]           | Combined exercise    | Total or normalweight women |
| Cordero Y et al (2015) [111]           | Combined exercise    | Total or normalweight women |
| da Silva SG et al (2017) [112]         | Combined exercise    | Total or normalweight women |
| Fernández-Buhigas I et al (2020) [113] | Combined exercise    | Total or normalweight women |
| Haakstad LA et al (2011) [114]         | Combined exercise    | Total or normalweight women |
| Peláez M et al (2019) [115]            | Combined exercise    | Total or normalweight women |
| Perales M et al (2016) [116]           | Combined exercise    | Total or normalweight women |
| Price BB et al (2012) [117]            | Combined exercise    | Total or normalweight women |
| Ramírez-Vélez R et al (2017) [118]     | Combined exercise    | Total or normalweight women |
| Rodríguez-Blanque R et al (2017) [119] | Combined exercise    | Total or normalweight women |
| Stafne SN et al (2012) [120]           | Combined exercise    | Total or normalweight women |
| Abd El Hameed AA et al (2011) [121]    | Metformin            | PCOS women                  |
| Begum MR et al (2009) [122]            | Metformin            | PCOS women                  |
| Glueck CJ et al (2002) [123]           | Metformin            | PCOS women                  |
| Jamal A et al (2012) [124]             | Metformin            | PCOS women                  |
| Khattab S et al (2011) [125]           | Metformin            | PCOS women                  |
| Løvvik TS et al (2019) [126]           | Metformin            | PCOS women                  |
| Valdés E et al (2018) [127]            | Metformin            | Other risk factors          |
| Vanky E et al (2004) [128]             | Metformin            | PCOS women                  |
| Vanky E et al (2010) [129]             | Metformin            | PCOS women                  |

**Table S3.** Characteristics of the interventions.

| Reference                       | Intervention                                                                                                                                                                                                                                                                                                                                                                | Control                                                                                                                                                                                                                                                                                                                |
|---------------------------------|-----------------------------------------------------------------------------------------------------------------------------------------------------------------------------------------------------------------------------------------------------------------------------------------------------------------------------------------------------------------------------|------------------------------------------------------------------------------------------------------------------------------------------------------------------------------------------------------------------------------------------------------------------------------------------------------------------------|
| <b>A. Exercise</b>              |                                                                                                                                                                                                                                                                                                                                                                             |                                                                                                                                                                                                                                                                                                                        |
| Barakat R et al (2009) [54]     | Duration: 26 weeks (12-13 wk until 38-39 wk).<br>Frequency: 3 times/week.<br>Exercises: 35-40 min. Warm up/cool-down, toning and joint mobilization exercises, barbells (3kg), low-medium resistance bands.<br>Type: Resistance exercise.<br>Intensity: Light-Moderate (<80% of predicted maximum heart rate).                                                              | The women were asked to maintain their physical activity during the study period.                                                                                                                                                                                                                                      |
| Barakat R et al (2016) [47]     | Duration: 28 weeks (9-11 wk until 38-39 wk).<br>Frequency: 3 times/week.<br>Exercises: 50-55 min. Warm up/cool-down, walking, aerobic exercise, aerobic dance, resistance exercises (2 kg weights, low resistance bands), flexibility, relaxation stretching, PFMT.<br>Type: Combined exercise.<br>Intensity: Moderate (<70% of predicted maximum heart rate, Borg: 12-14). | The women received general advice from their healthcare provider about the positive effects of physical activity. They had the same visits with health care providers as the intervention group. A questionnaire was conducted once a quarter. Those women who exercised continuously were excluded from the analysis. |
| Bisson M et al (2015) [48]      | Duration: 12 weeks (15 wk until 27 wk).<br>Frequency: 3 times/week.<br>Exercises: 60 min. Warm up/cool-down, stationary ergocycle, treadmill walk, muscular work-out.<br>Type: Combined exercise.<br>Intensity: Moderate (70% of peak heart rate, modified Borg: 3-5).                                                                                                      | The women were asked to continue with their usual activities, without restricting physical activity. Both groups received a pamphlet of the benefits of physical activity and the exercises they could do.                                                                                                             |
| Daly N et al (2017) [49]        | Duration: 22 weeks (>17 wk until delivery).<br>Frequency: 3 times week.<br>Exercises: 50-60 min. Warm up/cool-down, resistance or weight exercises, aerobic exercises, PFMT.<br>Type: Combined exercise.<br>Intensity: NA.                                                                                                                                                  | The women received written information about the exercise. Both groups received a pamphlet with information about healthy eating.                                                                                                                                                                                      |
| Garnæs KK et al (2016) [50]     | Duration: 25 weeks (12-18 wk until 39 wk).<br>Frequency: 4 times/week.<br>Exercises: 60 min. Walking/jogging, resistance training, PFMT.<br>Type: Combined exercise.<br>Intensity: Moderate (~80% of maximal capacity, Borg: 12-15).                                                                                                                                        | Information on healthy eating and lifestyles was provided. The pregnant women were asked to continue with their usual activities and were not discouraged from exercising.                                                                                                                                             |
| Kong K et al (2014) [44]        | Duration: 20 weeks (15 wk until 35 wk).<br>Frequency: 5 times/week.<br>Exercises: 30 min. Walk (Treadmills).<br>Type: Aerobic exercise.<br>Intensity: Moderate (cadence ≥80 steps per minute).                                                                                                                                                                              | The women received no recommendations for physical activity, but they were not discouraged from doing so.                                                                                                                                                                                                              |
| Nascimento SL et al (2011) [51] | Duration: ~18 weeks (~20 wk until delivery).<br>Frequency: 5 times/week.                                                                                                                                                                                                                                                                                                    | The women received no recommendations for physical activity.                                                                                                                                                                                                                                                           |

|                                  |                                                                                                                                                                                                                                                                                                                                                                   |                                                                                                                                 |
|----------------------------------|-------------------------------------------------------------------------------------------------------------------------------------------------------------------------------------------------------------------------------------------------------------------------------------------------------------------------------------------------------------------|---------------------------------------------------------------------------------------------------------------------------------|
|                                  | Exercises: 40 min. General stretching, strength exercises, relaxation, walking.<br>Type: Combined exercise.<br>Intensity: Moderate (<140 bpm of HR).                                                                                                                                                                                                              | Both groups received standardized nutritional counseling.                                                                       |
| Oostdam N et al (2012) [52]      | Duration: 24 weeks (15 wk until 39 wk).<br>Frequency: 2 times/week.<br>Exercises: 60 min. Warm up/cool-down, aerobic and strength exercises.<br>Type: Combined exercise.<br>Intensity: Moderate (Borg: 12).                                                                                                                                                       | The women did not receive any exercise program, but received the usual care, which is the same as women of a healthy weight.    |
| Ruiz JR et al (2013) [53]        | Duration: 30 weeks (9 wk until 39 wk).<br>Frequency: 3 times week.<br>Exercises: 50-55 min. Warm-up/cool-down, waking, stretching, aerobic exercises, aerobic dance, resistance exercises, barbells (3kg), low-medium elastic bands.<br>Type: Combined exercise.<br>Intensity: Light-Moderate (<60% age predicted maximum heart rate, Borg: 10-12).               | The women received standard care. Counseling on nutrition and physical activity was included, and exercise was not discouraged. |
| Seneviratne SN et al (2016) [45] | Duration: 15 weeks (20 wk until 35 wk).<br>Frequency: 3-5 times/week.<br>Exercises: 15-30 min. Stationary bicycle.<br>Type: Aerobic exercise.<br>Intensity: Moderate (40–59% VO <sub>2</sub> reserve).                                                                                                                                                            | The women did not receive the exercise program.                                                                                 |
| Wang C et al (2017) [46]         | Duration: 25 weeks (11 wk until 36 wk).<br>Frequency: 3 times/week.<br>Exercises: 45-60 min. Interval stationary cycling (Intensity intervals between moderate level, 65-75% of the age-predicted HRmax, Borg 12-14, and vigorous level, 75-85% of the age-predicted maximum heart rate, Borg 15-16).<br>Type: Aerobic exercise.<br>Intensity: Moderate-Vigorous. | The women continued with their usual activities, and physical exercise was not discouraged.                                     |

## B. Metformin

|                                    |                                                                                         |                                                                                                                                 |
|------------------------------------|-----------------------------------------------------------------------------------------|---------------------------------------------------------------------------------------------------------------------------------|
| Abd El Fattah EA et al (2016) [55] | Duration: 20 weeks (early 2 <sup>nd</sup> trimester until 36 wk).<br>Dose: 1000 mg/day. | Placebo was administered.                                                                                                       |
| Brink HS et al (2018) [56]         | Duration: 25 weeks (14 wk until 39 wk).<br>Dose: 1000 mg/day.                           | Women in both groups followed a 2000 Kcal/day diet.                                                                             |
| Chiswick C et al (2015) [57]       | Duration: 25 weeks (12-16 wk until 39 wk).<br>Dose: 2500 mg/day.                        | Placebo was administered.                                                                                                       |
| Nascimento IB et al (2020) [58]    | Duration: >20 weeks (<20 wk until delivery).<br>Dose: 1000 mg/day.                      | Women in both groups received the usual health care.<br>Both groups received nutritional and physical activity recommendations. |
| Syngelaki A et al (2016) [59]      | Duration: 25 weeks (12-18 wk until delivery).<br>Dose: 3000 mg/day.                     | Placebo was administered.<br>Both groups received nutritional and physical activity recommendations.                            |

PFMT: pelvic floor muscle training; NA: Not available

**Table S4.** Measure of outcomes.

| <b>Reference</b>                      | <b>Gestational diabetes mellitus</b>                                                                                  | <b>Hypertensive disorders</b>              |
|---------------------------------------|-----------------------------------------------------------------------------------------------------------------------|--------------------------------------------|
| Barakat R et al (2009) [54]           | Not applicable                                                                                                        | Not applicable                             |
| Barakat R et al (2016) [47]           | Medical records                                                                                                       | Gestational hypertension                   |
| Bisson M et al (2015) [48]            | Not available                                                                                                         | Gestational hypertension                   |
| Daly N et al (2017) [49]              | 75-g oral glucose tolerance test<br>(International Association of<br>Diabetes in Pregnancy Studies Group<br>criteria) | Not applicable                             |
| Garnæs KK et al (2016) [50]           | 75-g oral glucose tolerance test<br>(WHO/IADPSG 2013 definition)                                                      | Gestational hypertension                   |
| Kong K et al (2014) [44]              | Not available                                                                                                         | Gestational hypertension +<br>preeclampsia |
| Nascimento SL et al (2011)<br>[51]    | Not applicable                                                                                                        | Not applicable                             |
| Oostdam N et al (2012) [52]           | Not available                                                                                                         | Not applicable                             |
| Ruiz JR et al (2013) [53]             | Not available                                                                                                         | Gestational hypertension                   |
| Seneviratne SN et al (2016)<br>[45]   | 75-g oral glucose tolerance test                                                                                      | Gestational hypertension +<br>Preeclampsia |
| Wang C et al (2017) [46]              | 75-g oral glucose tolerance test                                                                                      | Gestational hypertension +<br>Preeclampsia |
| Abd El Fattah EA et al (2016)<br>[55] | 75-g oral glucose tolerance test                                                                                      | Gestational hypertension                   |
| Brink HS et al (2018) [56]            | 75-g oral glucose tolerance test                                                                                      | Preeclampsia                               |
| Chiswick C et al (2015) [57]          | 75-g oral glucose tolerance test                                                                                      | Gestational hypertension +<br>Preeclampsia |
| Nascimento IB et al (2020)<br>[58]    | World Health Organization criteria                                                                                    | Preeclampsia                               |
| Syngelaki A et al (2016) [59]         | 75-g oral glucose tolerance test                                                                                      | Gestational hypertension +<br>Preeclampsia |

Not applicable: if not measure gestational diabetes mellitus; Not available: if there is not information.

**Table S5.** Grades of Recommendation, Assessment, Development, and Evaluation.

| Certainty assessment                   |              |              |               |              |             |                                                                | Impact                                                                            | Certainty |
|----------------------------------------|--------------|--------------|---------------|--------------|-------------|----------------------------------------------------------------|-----------------------------------------------------------------------------------|-----------|
| No of studies                          | Study design | Risk of bias | Inconsistency | Indirectness | Imprecision | Other considerations                                           |                                                                                   |           |
| A. Gestational diabetes mellitus       |              |              |               |              |             |                                                                |                                                                                   |           |
| Aerobic exercise                       |              |              |               |              |             |                                                                |                                                                                   |           |
| 3                                      | RCT          | very serious | serious       | serious      | not serious | very strong association                                        | Meta-analysis: RR = 0.59 (0.41, 0.85)<br>NMA: RR = 0.51 (0.26, 0.97)              | LOW       |
| Combined exercise                      |              |              |               |              |             |                                                                |                                                                                   |           |
| 6                                      | RCT          | serious      | serious       | serious      | not serious | none                                                           | Meta-analysis: RR = 0.91 (0.67, 1.22)<br>NMA: RR = 0.75 (0.47, 1.19)              | VERY LOW  |
| Metformin                              |              |              |               |              |             |                                                                |                                                                                   |           |
| 5                                      | RCT          | very serious | serious       | serious      | not serious | none                                                           | Meta-analysis: RR = 0.78 [0.59, 1.02]<br>NMA: RR = 0.74 (0.49, 1.10)              | VERY LOW  |
| B. Hypertensive disorders of pregnancy |              |              |               |              |             |                                                                |                                                                                   |           |
| Aerobic exercise                       |              |              |               |              |             |                                                                |                                                                                   |           |
| 3                                      | RCT          | very serious | serious       | serious      | serious     | none                                                           | Meta-analysis: RR = 0.95 (0.56, 1.62)<br>NMA: RR = 1.19 (0.36, 3.89)              | VERY LOW  |
| Combined exercise                      |              |              |               |              |             |                                                                |                                                                                   |           |
| 4                                      | RCT          | serious      | serious       | serious      | not serious | strong association                                             | Meta-analysis: RR = 0.65 (0.36, 1.14)<br>NMA: RR = 0.64 (0.26, 1.57)              | LOW       |
| Metformin                              |              |              |               |              |             |                                                                |                                                                                   |           |
| 5                                      | RCT          | very serious | serious       | serious      | not serious | strong association                                             | Meta-analysis: RR = 0.48 (0.19, 1.22)<br>NMA: RR = 0.47 (0.22, 1.04)              | VERY LOW  |
| C. Maternal weight gain                |              |              |               |              |             |                                                                |                                                                                   |           |
| Aerobic exercise                       |              |              |               |              |             |                                                                |                                                                                   |           |
| 3                                      | RCT          | very serious | serious       | serious      | not serious | publication bias strongly suspected<br>very strong association | Meta-analysis: MWG = -1.91 Kg (-2.74, -1.07)<br>NMA: MWG = -1.40 Kg (-3.47, 0.68) | VERY LOW  |
| Combined exercise                      |              |              |               |              |             |                                                                |                                                                                   |           |
| 6                                      | RCT          | serious      | serious       | serious      | not serious | publication bias strongly suspected                            | Meta-analysis: MWG = -0.31 Kg (-1.06, 0.44)<br>NMA: MWG = -0.24 Kg (-1.68, 1.20)  | VERY LOW  |
| Resistance Exercise                    |              |              |               |              |             |                                                                |                                                                                   |           |
| 1                                      | RCT          | not serious  | not serious   | serious      | serious     | publication bias strongly suspected<br>strong association      | Meta-analysis: MWG = -1.35 Kg (-3.57, 0.88)<br>NMA: MWG = -1.35 Kg (-4.29, 1.59)  | LOW       |
| Metformin                              |              |              |               |              |             |                                                                |                                                                                   |           |
| 2                                      | RCT          | very serious | serious       | serious      | serious     | publication bias strongly suspected<br>very strong association | Meta-analysis: MWG = -2.82 Kg (-7.26, 1.62)<br>NMA: MWG = -2.93 (-4.98, -0.87)    | VERY LOW  |

**Table S6.** Transitivity analysis.**A. Gestational diabetes mellitus**

| Reference                     | Age          |            |             |            | BMI          |            |              |            |
|-------------------------------|--------------|------------|-------------|------------|--------------|------------|--------------|------------|
|                               | Intervention |            | Control     |            | Intervention |            | Control      |            |
|                               | $\bar{x}$    | SD         | $\bar{x}$   | SD         | $\bar{x}$    | SD         | $\bar{x}$    | SD         |
| <b>Physical exercise</b>      |              |            |             |            |              |            |              |            |
| Barakat R et al (2016)-1      | -            | -          | -           | -          | -            | -          | -            | -          |
| Barakat R et al (2016)-2      | -            | -          | -           | -          | -            | -          | -            | -          |
| Bisson M et al (2015)         | 30.5         | 3.7        | 31.0        | 4.0        | 34.6         | 5.4        | 33.9         | 4.5        |
| Daly N et al (2017)           | 30.0         | 5.1        | 29.4        | 4.8        | 34.7         | 4.6        | 34.7         | 5.1        |
| Garnæs KK et al (2016)        | 31.3         | 3.8        | 31.4        | 4.7        | 33.9         | 3.8        | 35.1         | 4.6        |
| Kong K et al (2014)-1         | 26.2         | 2.6        | 27.3        | 3.6        | 26.5         | 1.2        | 27.4         | 1.4        |
| Kong K et al (2014)-2         | 28.6         | 5.3        | 25.7        | 4.0        | 34.7         | 4.6        | 34.2         | 3.6        |
| Oostdam N et al (2012)        | 30.8         | 5.2        | 30.1        | 4.5        | 33.0         | 3.7        | 33.9         | 5.6        |
| Ruiz JR et al (2013)          | -            | -          | -           | -          | -            | -          | -            | -          |
| Seneviratne SN et al (2016)   | -            | -          | -           | -          | 32.1         | 4.4        | 34.1         | 5.9        |
| Wang C et al (2017)           | 32.1         | 4.6        | 32.5        | 4.9        | 26.8         | 2.7        | 26.8         | 2.8        |
| <b>Pooled</b>                 | <b>30.1</b>  | <b>1.9</b> | <b>29.8</b> | <b>2.1</b> | <b>31.9*</b> | <b>3.9</b> | <b>32.5*</b> | <b>4.2</b> |
| <b>Metformin</b>              |              |            |             |            |              |            |              |            |
| Abd El Fattah EA et al (2016) | 26.9         | 5.2        | 26.2        | 5.5        | 36.4         | 1.0        | 36.2         | 0.9        |
| Brink HS et al (2018)         | 29.3         | 5.2        | 30.7        | 5.2        | 31.3         | 5.8        | 30.0         | 5.5        |
| Chiswick C et al (2015)       | 28.7         | 5.8        | 28.9        | 5.1        | 37.8         | 4.7        | 37.5         | 5.5        |
| Nascimento IB et al (2020)    | 28.6         | 6.2        | 29.6        | 6.1        | 37.5         | 4.6        | 37.2         | 5.7        |
| Syngelaki A et al (2016)      | -            | -          | -           | -          | -            | -          | -            | -          |
| <b>Pooled</b>                 | <b>28.3</b>  | <b>1.0</b> | <b>28.8</b> | <b>1.7</b> | <b>36.4*</b> | <b>1.2</b> | <b>35.7*</b> | <b>1.5</b> |

From the confidence intervals of the pooled (not shown), the standard error was obtained. And taking as N the number of valid studies included in each pooled, the standard deviation of each pooled was calculated. \*Statistically significant differences

**B. Hypertensive disorders of pregnancy**

| Reference                     | Age          |            |             |            | BMI          |            |              |            |
|-------------------------------|--------------|------------|-------------|------------|--------------|------------|--------------|------------|
|                               | Intervention |            | Control     |            | Intervention |            | Control      |            |
|                               | $\bar{x}$    | SD         | $\bar{x}$   | SD         | $\bar{x}$    | SD         | $\bar{x}$    | SD         |
| <b>Physical exercise</b>      |              |            |             |            |              |            |              |            |
| Barakat R et al (2016)-1      | -            | -          | -           | -          | -            | -          | -            | -          |
| Barakat R et al (2016)-2      | -            | -          | -           | -          | -            | -          | -            | -          |
| Bisson M et al (2015)         | 30.5         | 3.7        | 31.0        | 4.0        | 34.6         | 5.4        | 33.9         | 4.5        |
| Garnæs KK et al (2016)        | 31.3         | 3.8        | 31.4        | 4.7        | 33.9         | 3.8        | 35.1         | 4.6        |
| Kong K et al (2014)-1         | 26.2         | 2.6        | 27.3        | 3.6        | 26.5         | 1.2        | 27.4         | 1.4        |
| Kong K et al (2014)-2         | 28.6         | 5.3        | 25.7        | 4.0        | 34.7         | 4.6        | 34.2         | 3.6        |
| Ruiz JR et al (2013)          | -            | -          | -           | -          | -            | -          | -            | -          |
| Seneviratne SN et al (2016)   | -            | -          | -           | -          | 32.1         | 4.4        | 34.1         | 5.9        |
| Wang C et al (2017)           | 32.1         | 4.6        | 32.5        | 4.9        | 26.8         | 2.7        | 26.8         | 2.8        |
| <b>Pooled</b>                 | <b>29.9</b>  | <b>2.3</b> | <b>29.8</b> | <b>2.5</b> | <b>31.3*</b> | <b>3.6</b> | <b>31.8*</b> | <b>3.9</b> |
| <b>Metformin</b>              |              |            |             |            |              |            |              |            |
| Abd El Fattah EA et al (2016) | 26.9         | 5.2        | 26.2        | 5.5        | 36.4         | 1.04       | 36.2         | 0.99       |
| Brink HS et al (2018)         | 29.3         | 5.2        | 30.7        | 5.2        | 31.3         | 5.8        | 30           | 5.5        |
| Chiswick C et al (2015)       | 28.7         | 5.8        | 28.9        | 5.1        | 37.8         | 4.7        | 37.5         | 5.5        |
| Nascimento IB et al (2020)    | 28.6         | 6.2        | 29.6        | 6.1        | 37.5         | 4.6        | 37.2         | 5.7        |
| Syngelaki A et al (2016)      | -            | -          | -           | -          | -            | -          | -            | -          |
| <b>Pooled</b>                 | <b>28.3</b>  | <b>1.0</b> | <b>28.8</b> | <b>1.7</b> | <b>36.4*</b> | <b>1.2</b> | <b>35.7*</b> | <b>1.5</b> |

From the confidence intervals of the pooled (not shown), the standard error was obtained. And taking as N the number of valid studies included in each pooled, the standard deviation of each pooled was calculated. \*Statistically significant differences

### C. Maternal weight gain

| Reference                     | Age          |            |             |            | BMI          |            |             |            |
|-------------------------------|--------------|------------|-------------|------------|--------------|------------|-------------|------------|
|                               | Intervention |            | Control     |            | Intervention |            | Control     |            |
|                               | $\bar{x}$    | SD         | $\bar{x}$   | SD         | $\bar{x}$    | SD         | $\bar{x}$   | SD         |
| <b>Physical exercise</b>      |              |            |             |            |              |            |             |            |
| Barakat R et al (2009)-1      | -            | -          | -           | -          | -            | -          | -           | -          |
| Barakat R et al (2009)-2      | -            | -          | -           | -          | -            | -          | -           | -          |
| Bisson M et al (2015)         | 30.5         | 3.7        | 31.0        | 4.0        | 34.6         | 5.4        | 33.9        | 4.5        |
| Daly N et al (2017)           | 30.0         | 5.1        | 29.4        | 4.8        | 34.7         | 4.6        | 34.7        | 5.1        |
| Garnæs KK et al (2016)        | 31.3         | 3.8        | 31.4        | 4.7        | 33.9         | 3.8        | 35.1        | 4.6        |
| Kong K et al (2014)-1         | 26.2         | 2.6        | 27.3        | 3.6        | 26.5         | 1.2        | 27.4        | 1.4        |
| Kong K et al (2014)-2         | 28.6         | 5.3        | 25.7        | 4.0        | 34.7         | 4.6        | 34.2        | 3.6        |
| Nascimento SL et al (2011)    | 29.7         | 6.8        | 30.9        | 5.9        | 34.8         | 6.6        | 36.4        | 6.9        |
| Oostdam N et al (2012)        | 30.8         | 5.2        | 30.1        | 4.5        | 33.0         | 3.7        | 33.9        | 5.6        |
| Ruiz JR et al (2013)          | -            | -          | -           | -          | -            | -          | -           | -          |
| Seneviratne SN et al (2016)   | -            | -          | -           | -          | 32.1         | 4.4        | 34.1        | 5.9        |
| Wang C et al (2017)           | 32.1         | 4.6        | 32.5        | 4.9        | 26.8         | 2.7        | 26.8        | 2.8        |
| <b>Pooled</b>                 | <b>30.1</b>  | <b>1.9</b> | <b>29.9</b> | <b>1.9</b> | <b>32.3*</b> | <b>3.9</b> | <b>32.9</b> | <b>4.3</b> |
| <b>Metformin</b>              |              |            |             |            |              |            |             |            |
| Abd El Fattah EA et al (2016) | 26.9         | 5.2        | 26.2        | 5.5        | 36.4         | 1.0        | 36.2        | 0.9        |
| Chiswick C et al (2015)       | 28.7         | 5.8        | 28.9        | 5.1        | 37.8         | 4.7        | 37.5        | 5.5        |
| <b>Pooled</b>                 | <b>27.8</b>  | <b>1.3</b> | <b>27.6</b> | <b>1.9</b> | <b>37.1*</b> | <b>0.9</b> | <b>36.8</b> | <b>0.9</b> |

From the confidence intervals of the pooled (not shown), the standard error was obtained. And taking as N the number of valid studies included in each pooled, the standard deviation of each pooled was calculated. \*Statistically significant differences



**Table S7.** Results for direct pairwise comparisons and network meta-analysis among pregnant women with obesity.

**A. Gestational diabetes mellitus**

|            | Control              | Aerobic              | Combined             | Resistance | Metformin            |
|------------|----------------------|----------------------|----------------------|------------|----------------------|
| Control    |                      | 1.82<br>(0.41, 8.20) | 0.98<br>(0.71, 1.36) |            | 0.78<br>(0.59, 1.02) |
| Aerobic    | 1.91<br>(0.38, 9.60) |                      | -                    |            | -                    |
| Combined   | 0.85<br>(0.49, 1.46) | 0.44<br>(0.08, 2.44) |                      |            | -                    |
| Resistance |                      |                      |                      |            |                      |
| Metformin  | 0.75<br>(0.51, 1.09) | 0.39<br>(0.07, 2.05) | 0.88<br>(0.46, 1.67) |            |                      |

**B. Hypertensive disorders of pregnancy**

| Control    |                       | 2.41<br>(0.37, 15.65) | 0.62<br>(0.24, 1.58) |  | 0.48<br>(0.19, 1.22) |
|------------|-----------------------|-----------------------|----------------------|--|----------------------|
| Aerobic    | 2.58<br>(0.26, 25.62) |                       | -                    |  | -                    |
| Combined   | 0.68<br>(0.16, 2.82)  | 0.26<br>(0.02, 3.91)  |                      |  | -                    |
| Resistance |                       |                       |                      |  |                      |
| Metformin  | 0.46<br>(0.18, 1.13)  | 0.18<br>(0.02, 2.10)  | 0.68<br>(0.12, 3.72) |  |                      |

**C. Maternal weight gain**

| Control    |                          | -1.13<br>(-3.53, 1.28) | 0.04<br>(-1.08, 1.15)  | -1.30<br>(-4.34, 1.74) | -2.82<br>(-7.26, 1.62) |
|------------|--------------------------|------------------------|------------------------|------------------------|------------------------|
| Aerobic    | -1.05<br>(-4.82, 2.73)   |                        | -                      | -                      | -                      |
| Combined   | -0.03<br>(-1.93, 1.88)   | 1.02<br>(-3.21, 5.25)  |                        | -                      | -                      |
| Resistance | -1.30<br>(-5.82, 3.22)   | -0.25<br>(-6.14, 5.64) | -1.27<br>(-6.18, 3.63) |                        | -                      |
| Metformin  | -2.88*<br>(-5.37, -0.40) | -1.84<br>(-6.35, 2.68) | -2.86<br>(-5.99, 0.27) | -1.58<br>(-6.74, 3.57) |                        |

Light gray indicates lack of direct and indirect comparisons. Dark gray separates direct from indirect comparisons. Gestational diabetes mellitus and hypertensive disorders of pregnancy were measured as risk ratio (95% CI). Maternal weight gain was measured as mean difference (95% CI). Upper diagonal: standard meta-analysis. Lower diagonal: network meta-analysis estimates. \*Statistical significance.

**Figure S1.** Direct pairwise comparisons by outcome.

**A. Gestational diabetes mellitus**

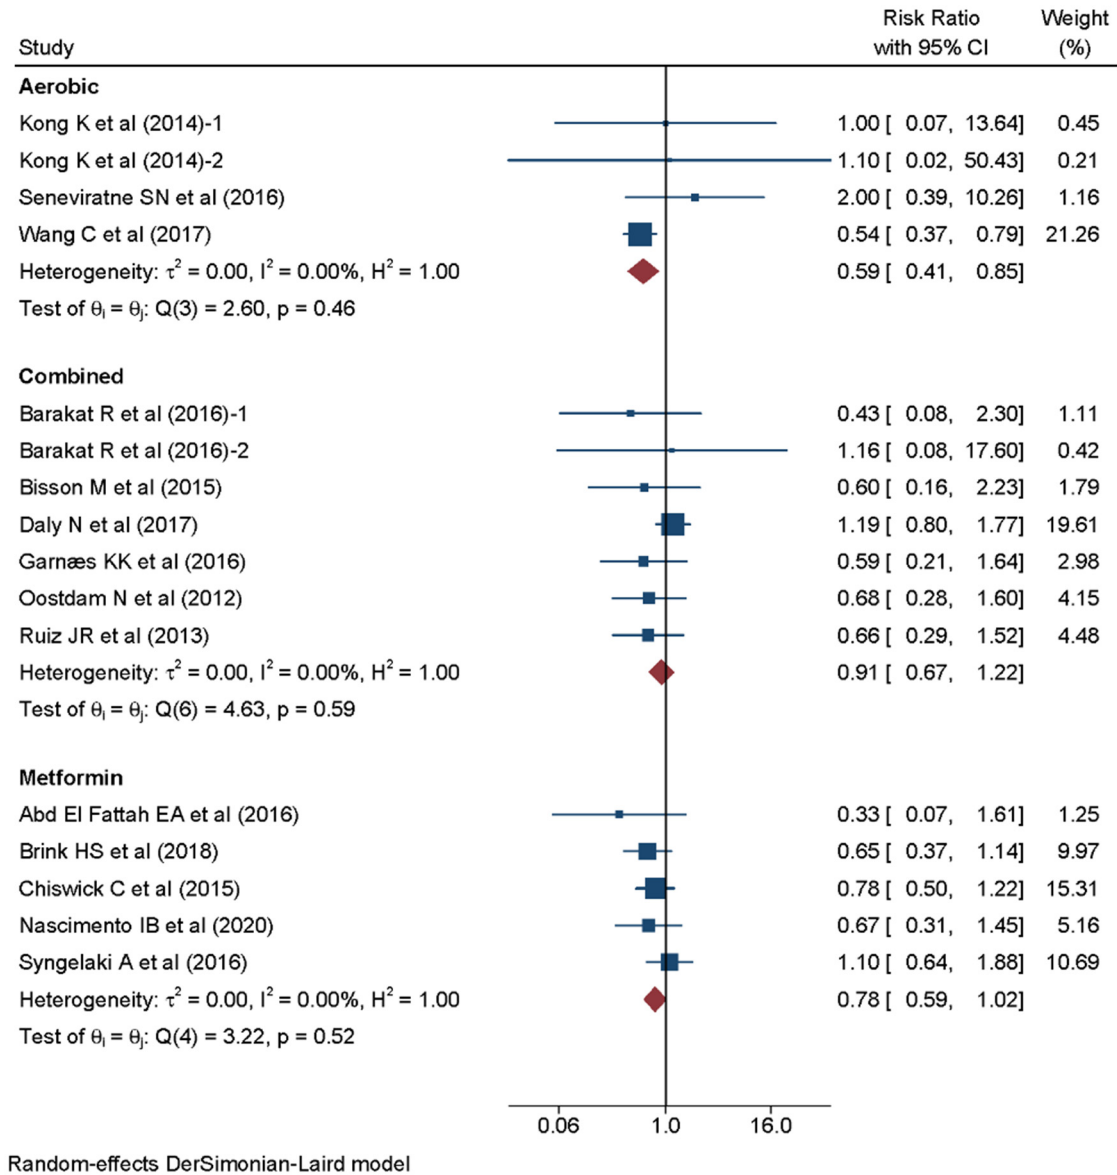

Effect size of individual studies shown in blue (square), and effect size of pooled shown in red (rhombus).

## B. Hypertensive disorders of pregnancy

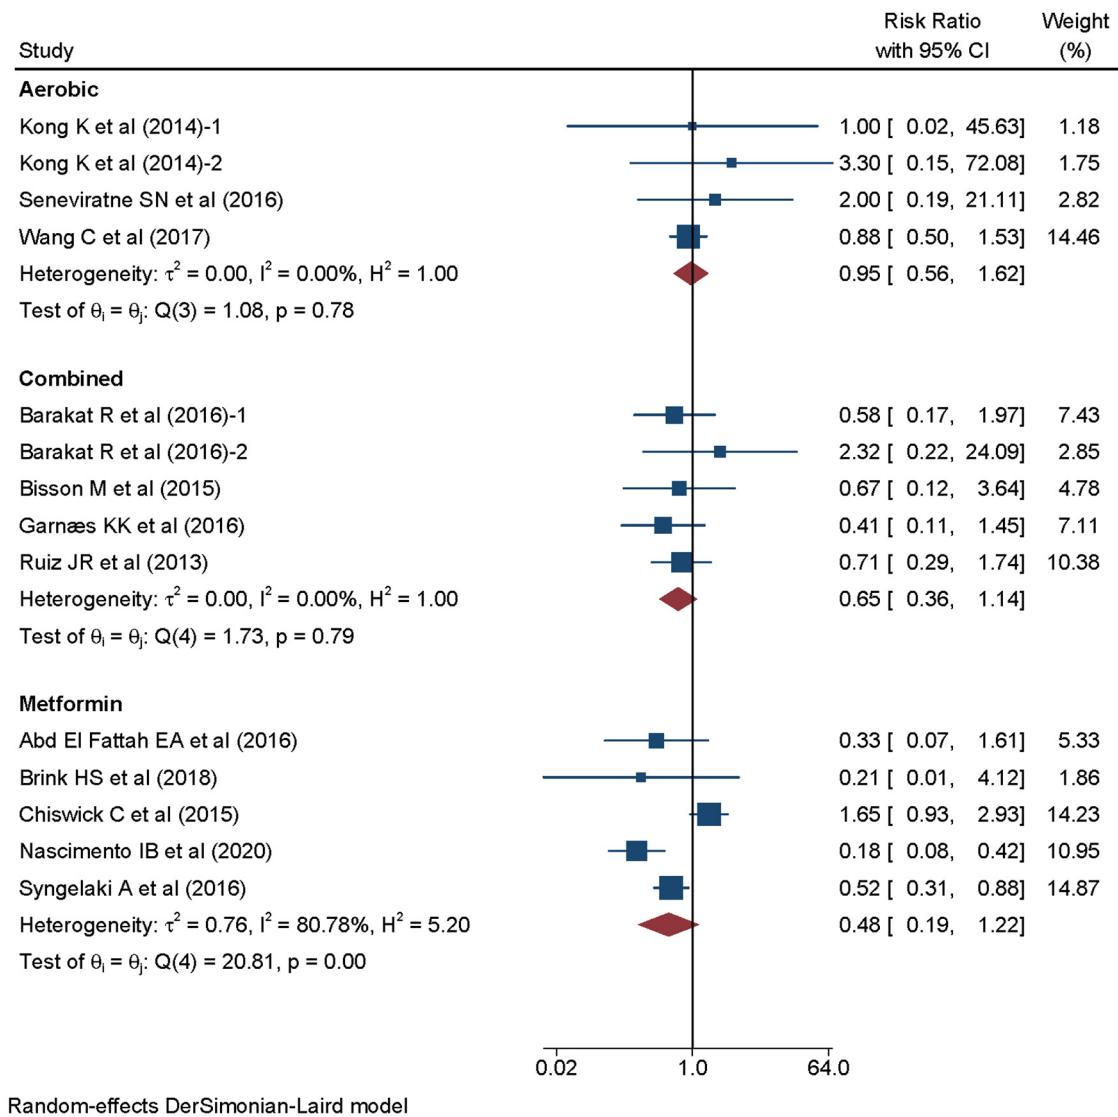

Effect size of individual studies shown in blue (square), and effect size of pooled shown in red (rhombus).

### C. Maternal weight gain

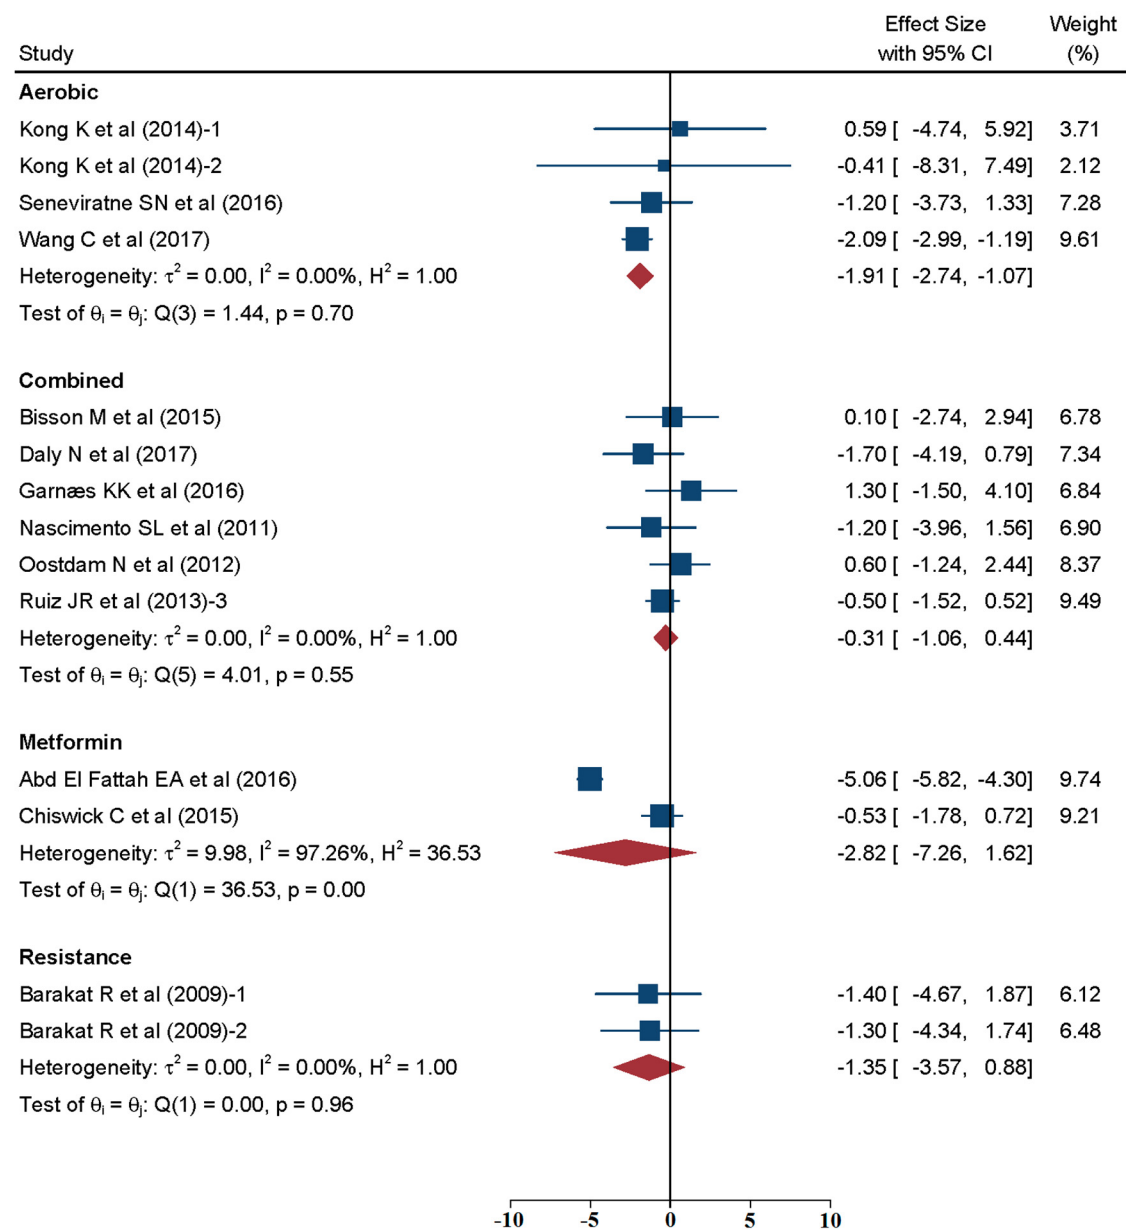

Random-effects DerSimonian-Laird model

Effect size of individual studies shown in blue (square), and effect size of pooled shown in red (rhombus).

**Figure S2.** Risk of bias.

**A.** Risk of bias summary

|                             | Randomization process | Assignment to intervention | Adhering to intervention | Missing outcome data | Measurement of the outcome | Selection of the reported result | Overall bias |
|-----------------------------|-----------------------|----------------------------|--------------------------|----------------------|----------------------------|----------------------------------|--------------|
| Abd El Fattah EA (2016)     | +                     | +                          | +                        | +                    | ?                          | +                                | +            |
| Barakat R et al (2009)      | +                     | +                          | +                        | +                    | +                          | +                                | +            |
| Barakat R et al (2016)      | +                     | ?                          | +                        | +                    | +                          | +                                | ?            |
| Bisson M et al (2015)       | +                     | ?                          | ?                        | +                    | +                          | +                                | ?            |
| Brink HS et al (2018)       | +                     | +                          | +                        | +                    | ?                          | +                                | +            |
| Chiswick C et al (2015)     | +                     | +                          | ?                        | +                    | +                          | +                                | +            |
| Daly N et al (2017)         | +                     | ?                          | +                        | ?                    | ?                          | +                                | +            |
| Garnaes KK et al (2016)     | +                     | ?                          | +                        | ?                    | +                          | +                                | +            |
| Kong K et al (2014)         | +                     | ?                          | +                        | ?                    | ?                          | +                                | +            |
| Nascimento IB et al (2020)  | +                     | +                          | +                        | +                    | ?                          | +                                | +            |
| Nascimento SL et al (2011)  | +                     | ?                          | ?                        | +                    | ?                          | +                                | ?            |
| Oostdam N et al (2012)      | +                     | ?                          | +                        | +                    | +                          | +                                | +            |
| Ruiz JR et al (2013)        | +                     | ?                          | +                        | +                    | ?                          | +                                | ?            |
| Seneviratne SN et al (2016) | +                     | ?                          | +                        | +                    | ?                          | +                                | +            |
| Syngelaki A et al (2016)    | +                     | +                          | +                        | +                    | ?                          | +                                | ?            |
| Wang C et al (2017)         | +                     | +                          | +                        | +                    | ?                          | +                                | +            |

+ Low risk of bias    ? Unclear risk of bias    + High risk of bias

**B.** Risk of bias graph.

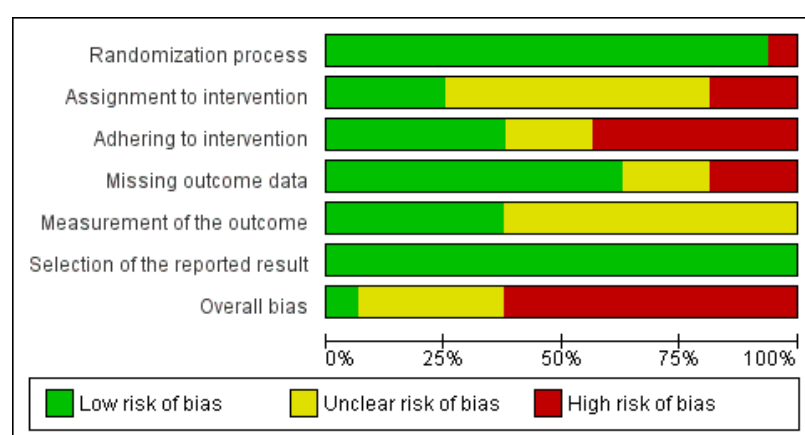

**Figure S3.** Cumulative probabilities by outcome.

**A. Gestational diabetes mellitus**

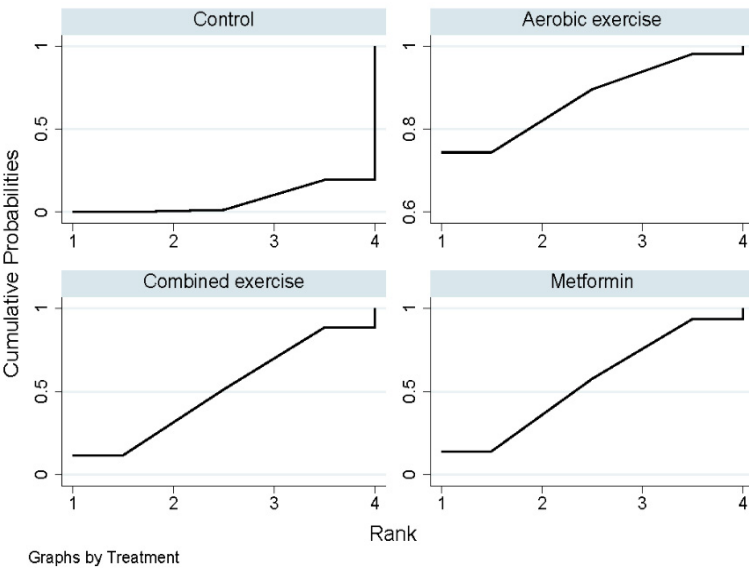

**B. Hypertensive disorders of pregnancy**

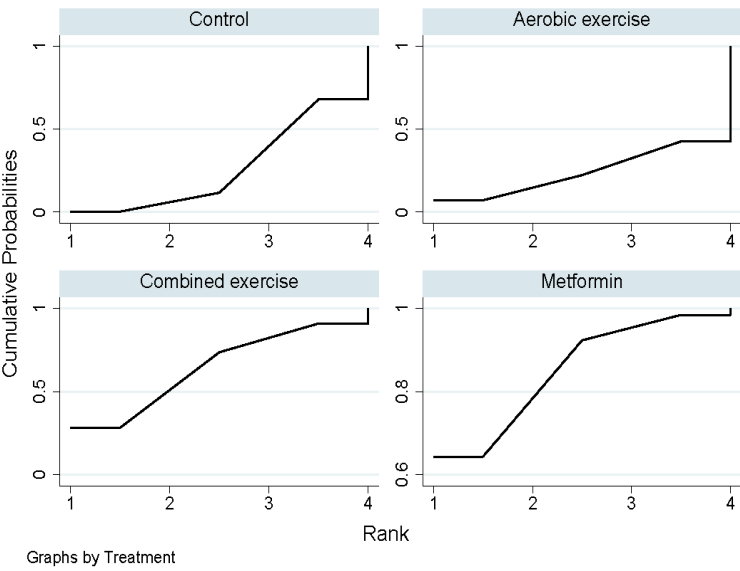

**C. Maternal weight gain**

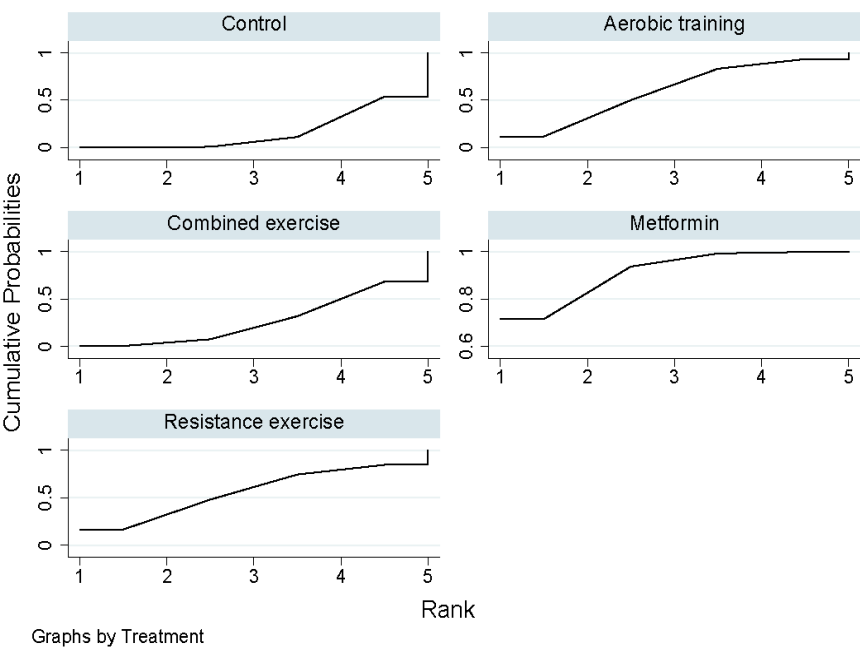

**Figure S4.** Direct pairwise comparisons and network meta-analysis by outcome among pregnant women with obesity.

### A. Gestational diabetes mellitus

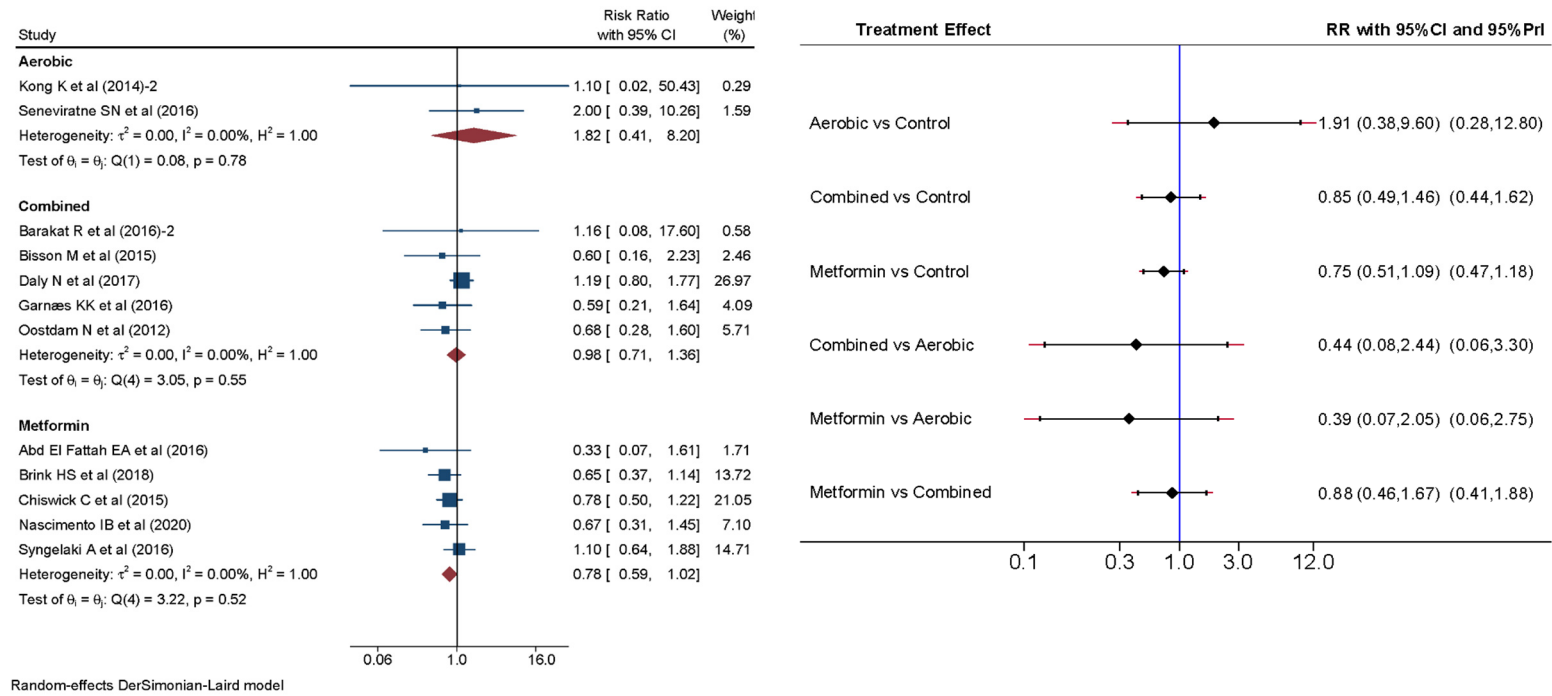

### B. Hypertensive disorders of pregnancy

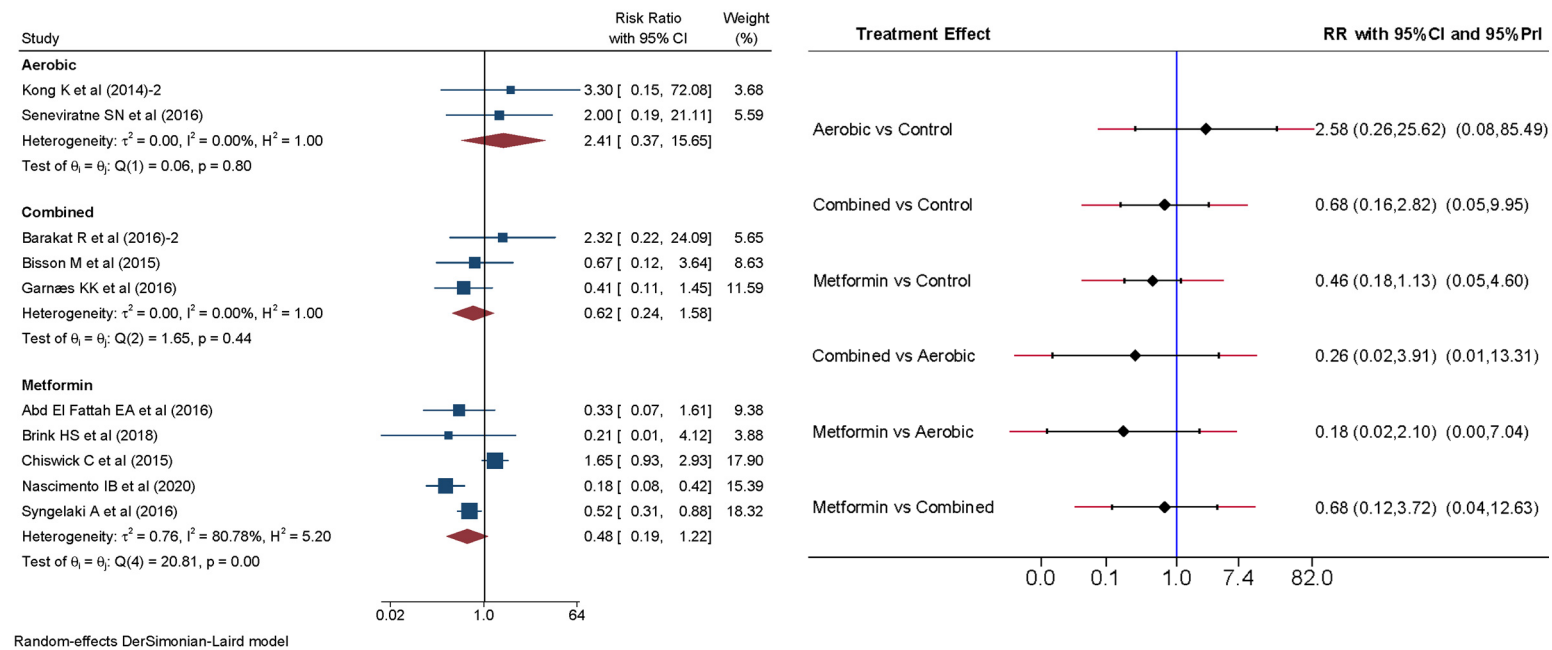

## C. Maternal weight gain

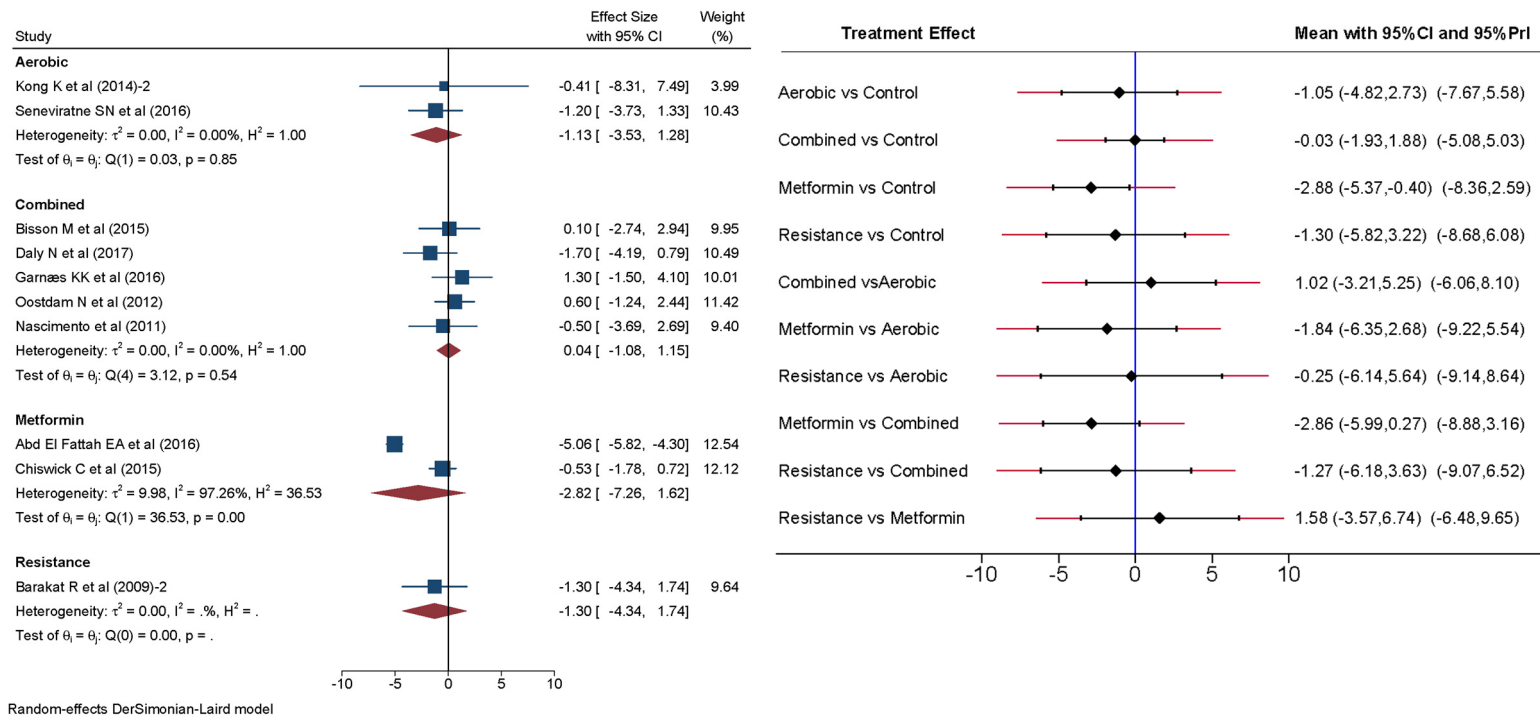

Left, standard meta-analyses; right, network meta-analysis estimates. Risk of GDM and HDP measured as risk ratio (RR, and 95% confidence interval); MWG measured as mean difference (Mean, and 95% confidence interval).



**Figure S5.** Funnel plot by outcome.

**A. Gestational diabetes mellitus**

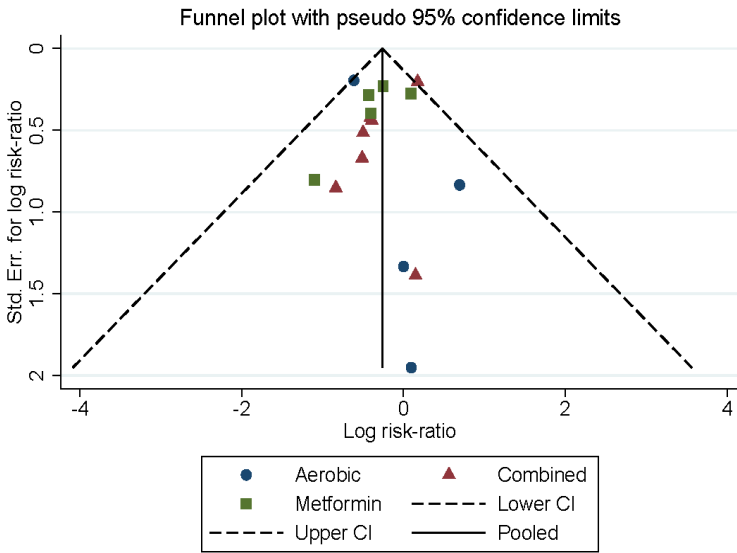

**B. Hypertensive disorders of pregnancy**

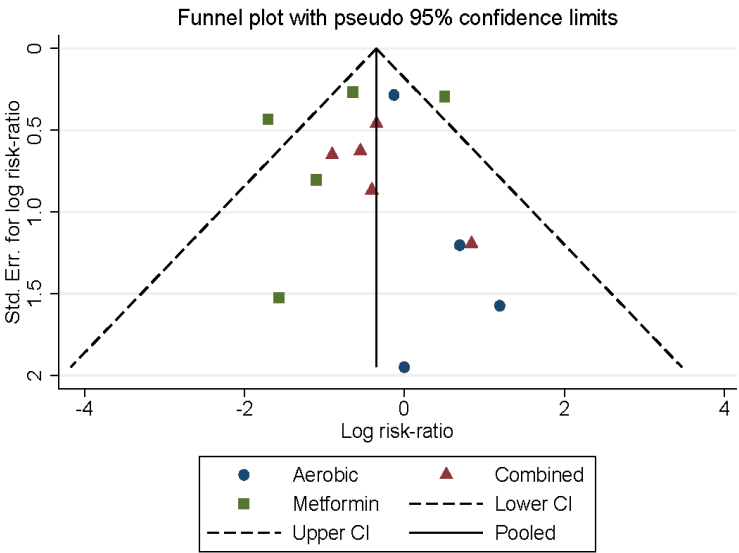

**C. Maternal weight gain**

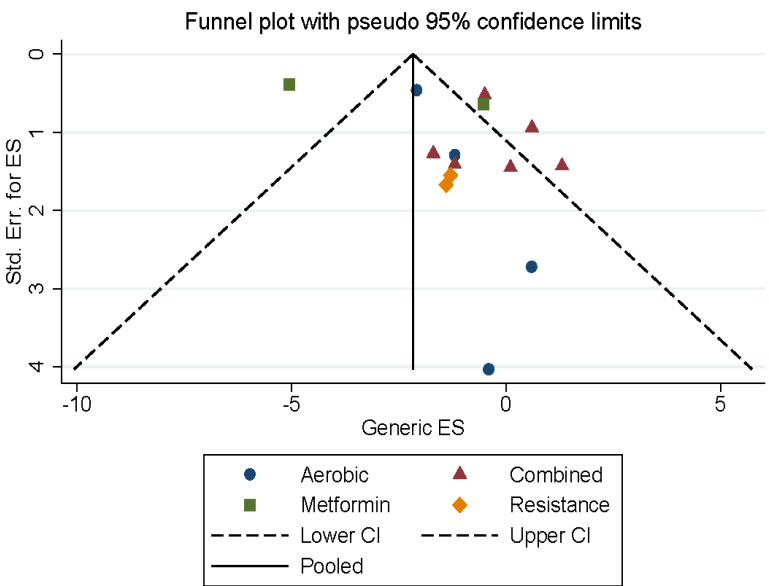

Supplement: s1 [file s1]
